# Supplementary material for: Pressure-driven electronic phase transition in the high-pressure phase of nitrogen-rich 1H-tetrazoles
Source: Royal Society of Chemistry journal article supplement (doi:10.1039/d1ra00522g), 2021-01-01
Supplement: d1ra00522g1.pdf [file d1ra00522g1.pdf]

## Electronic Supplementary Information:

### Pressure-driven electronic phase transition in the high-pressure phase of Nitrogen-rich 1-H Tetrazoles

Ying Liu,<sup>†a,b</sup> Huifang Du,<sup>†c</sup> Leiming Fang,<sup>†d</sup> Fei Sun,<sup>e</sup> Haipeng Su,<sup>a</sup> Zhongxue Ge,<sup>\*a</sup> Wei Guo,<sup>\*c</sup> and Jinlong Zhu<sup>†b,e</sup>

<sup>a</sup>*Xi'an Modern Chemistry Research Institute, Xi'an, 710065, China*

<sup>b</sup>*Department of Physics, Shenzhen Engineering Research Center for Frontier Materials Synthesis at High Pressures, Southern University of Science and Technology, Shenzhen 518055, China*

<sup>c</sup>*Beijing Key Laboratory of Nanophotonics and Ultrafine Optoelectronic Systems, School of Physics, Beijing Institute of Technology, Beijing 100081, China*

<sup>d</sup>*Key Laboratory for Neutron Physics, Institute of Nuclear Physics and Chemistry, China Academy of Engineering Physics, Mianyang 621900, China<sup>d</sup>*

<sup>e</sup>*Center for High Pressure Science and Technology Advanced Research (HPSTAR), Beijing, 100094, China*

<sup>†</sup>Y. L., H. D. and L. F. contributed equally to this work.

\*To whom correspondence may be addressed. Email: [gzx204@sina.com](mailto:gzx204@sina.com); [weigu7@bit.edu.cn](mailto:weigu7@bit.edu.cn), [zhujl@sustech.edu.cn](mailto:zhujl@sustech.edu.cn).

In this study, we investigated the phase transition of 1H-tetrazole under high pressure at room temperature using in situ Raman, IR spectra, synchrotron X-ray diffraction (XRD) and Neutron diffraction techniques. Combined with first-principles calculations, we propose a possible hydrogen-bond-assisted phase transition in the high-pressure counterpart, which has not been reported in previous studies. We uncover the novel electronic and stereo-chemical evolution of 1H-tetrazole (CN<sub>4</sub>H<sub>2</sub>), providing a fundamental understanding of the nitrogen-rich system and a potential pathway to find a targeted system for new-generation high-energy materials.

Table S1 Lattice parameters of 1H-tetrazole in Run I of XRD

| Pressure (GPa) | a (Å)  | Error   | b (Å)  | Error   | c (Å)  | Error   | α (°)  | Error   | β (°)  | Error   | γ (°)  | Error   | V (Å <sup>3</sup> ) | Error   |
|----------------|--------|---------|--------|---------|--------|---------|--------|---------|--------|---------|--------|---------|---------------------|---------|
| 0.24           | 3.6077 | 0.0028  | 4.7098 | 0.004   | 4.9285 | 0.007   | 107.97 | 0.011   | 106.92 | 0.011   | 100.27 | 0.008   | 72.82               | 0.008   |
| 4.1            | 5.2359 | 0.07058 | 6.4303 | 0.07747 | 4.8361 | 0.01801 | 84.02  | 0.19041 | 73.19  | 0.15667 | 134.99 | 0.02089 | 98.12               | 0.0583  |
| 5.5            | 5.1298 | 0.0567  | 6.3174 | 0.06903 | 4.8005 | 0.01843 | 84.48  | 0.15798 | 72.63  | 0.13449 | 134.28 | 0.01926 | 96.82               | 0.05359 |
| 7.3            | 5.1629 | 0.06872 | 6.1958 | 0.06975 | 4.7521 | 0.02001 | 85.03  | 0.18071 | 72.10  | 0.15173 | 134.04 | 0.01841 | 93.44               | 0.04937 |
| 9.2            | 4.8642 | 0.05912 | 6.0935 | 0.06694 | 4.6554 | 0.01563 | 83.85  | 0.17323 | 73.86  | 0.13618 | 133.94 | 0.02536 | 86.00               | 0.04065 |
| 10.5           | 5.2573 | 0.10042 | 6.1150 | 0.08325 | 4.7023 | 0.02885 | 86.21  | 0.24399 | 71.35  | 0.20401 | 134.14 | 0.0377  | 93.06               | 0.10322 |
| 12.2           | 4.8609 | 0.06241 | 6.0330 | 0.06521 | 4.6523 | 0.01871 | 84.66  | 0.17498 | 73.09  | 0.14059 | 134.13 | 0.0259  | 84.56               | 0.06148 |
| 15.3           | 4.7788 | 0.08437 | 5.9054 | 0.07591 | 4.6202 | 0.02906 | 85.10  | 0.2081  | 72.29  | 0.16811 | 133.87 | 0.05329 | 80.78               | 0.13271 |
| 17.4           | 4.5434 | 0.08961 | 5.8264 | 0.08828 | 4.5745 | 0.03584 | 83.90  | 0.22232 | 73.47  | 0.18627 | 133.41 | 0.05975 | 76.00               | 0.09804 |

Table S2 Atomic coordinates of 1H-tetrazole at representative pressure points in Run I of X-ray and neutron diffraction

| Pressure | 0.24 GPa                             |              |              | 4 GPa                                   |           |          | 8 GPa                                   |           |          |
|----------|--------------------------------------|--------------|--------------|-----------------------------------------|-----------|----------|-----------------------------------------|-----------|----------|
|          | P1 (one molecule in unit cell) X-ray |              |              | P1 (two molecules in unit cell) Neutron |           |          | P1 (two molecules in unit cell) Neutron |           |          |
| label    | x/a                                  | y/b          | z/c          | x/a                                     | y/b       | z/c      | x/a                                     | y/b       | z/c      |
| C5       | 0.757(30)                            | 0.999(27)    | 0.789(21)    | 0.52(19)                                | 0.61(12)  | 0.67(8)  | 0.52(12)                                | 0.61(11)  | 0.68(5)  |
| N1       | 0.740(26)                            | 0.025(31)    | 0.631(23)    | 0.81(7)                                 | 0.875(31) | 0.40(7)  | 0.82(9)                                 | 0.879(29) | 0.41(4)  |
| N2       | 0.894(19)                            | 0.267(17)    | 0.622(20)    | 0.63(9)                                 | 0.88(7)   | 0.24(8)  | 0.65(13)                                | 0.88(10)  | 0.24(7)  |
| N3       | 0.824(15)                            | 0.265(12)    | 0.304(18)    | 0.23(6)                                 | 0.61(10)  | 0.42(7)  | 0.24(11)                                | 0.62(8)   | 0.42(4)  |
| N4       | 0.436(14)                            | 0.650(13)    | 0.335(23)    | 0.15(4)                                 | 0.44(5)   | 0.70(8)  | 0.15(5)                                 | 0.44(5)   | 0.70(7)  |
| H5       | 0.801(fixed)                         | 0.759(fixed) | 0.439(fixed) | 0.5(4)                                  | 0.55(27)  | 0.82(24) | 0.6(3)                                  | 0.55(23)  | 0.83(18) |
| H1       | 0.078(fixed)                         | 0.064(fixed) | 0.958(fixed) | 0.94(29)                                | 0.98(20)  | 0.65(20) | 0.9(3)                                  | 0.98(24)  | 0.64(23) |
| C25      |                                      |              |              | 0.50(12)                                | 0.38(10)  | 0.33(5)  | 0.50(13)                                | 0.38(8)   | 0.32(5)  |
| N21      |                                      |              |              | 0.18(8)                                 | 0.11(3)   | 0.60(7)  | 0.17(8)                                 | 0.108(29) | 0.59(4)  |
| N22      |                                      |              |              | 0.33(8)                                 | 0.09(7)   | 0.78(8)  | 0.31(13)                                | 0.08(9)   | 0.77(6)  |
| N23      |                                      |              |              | 0.73(6)                                 | 0.34(8)   | 0.61(7)  | 0.72(7)                                 | 0.34(7)   | 0.61(5)  |
| N24      |                                      |              |              | 0.85(4)                                 | 0.53(4)   | 0.33(7)  | 0.85(4)                                 | 0.53(4)   | 0.32(5)  |
| H25      |                                      |              |              | 0.49(20)                                | 0.45(14)  | 0.17(11) | 0.49(25)                                | 0.45(21)  | 0.16(12) |

Table S3 Frequencies and assignments of crystal vibration modes

| Our work |        | Ref 1  |                 | Ref 2  | Ref 3 |                                 |
|----------|--------|--------|-----------------|--------|-------|---------------------------------|
| Raman    | IR     | Raman  | IR              | Raman  | Raman |                                 |
| 659      | 663    | 663.7  | 663.1           | 663.9  | 665   | $\gamma$ (ring)                 |
| 905      | 905.9  | 905.4  | 907.2           | 907    | 908   | $\gamma$ (C5-H5)                |
|          | 937.6  |        | 937.1           |        | 938   | $\delta$ (N-N=N)                |
| 947      | 951.5  | 947.2  | 951             | 947.6  |       | $\delta$ (N-C=N)                |
| 1012.7   | 1011.2 | 1013.7 | 999.2<br>1015.1 | 1015   | 1012  | $\nu$ (N1-N2)                   |
| 1049.6   | 1050.3 | 1048.6 | 1049.6          | 1049   | 1048  | $\nu$ (N3-N4)                   |
| 1085.4   | 1085.5 | 1086.1 | 1085.3          | 1086.1 | 1082  | $\delta$ (C5-H5)                |
| 1145.3   | 1144.5 | 1144.5 | 1145.1          | 1144.8 | 1140  | $\delta$ (N1-H1)+ $\nu$ (C5=N4) |
| 1260.6   | 1256.4 | 1259.9 | 1259.3          | 1259.9 | 1259  | $\nu$ (C5-N1)                   |
|          | 1331   |        |                 |        |       |                                 |
|          | 1387   |        |                 |        |       |                                 |
| 1445.7   | 1445   | 1448.9 | 1444.8          | 1445.3 | 1440  | $\nu$ (N2=N3)                   |
| 1353.3   | 1452   |        | 1451.6          | 1451.9 | 1450  |                                 |
| 1528     | 1524   | 1530.3 | 1524.6          | 1526.3 | 1518  | $\nu$ (C5=N4)+ $\delta$ (N-H)   |
| 3154.7   | 3157   | 3158.5 | 3158.3          | 3157.1 | 3150  | $\nu$ (C5-H5)                   |

Table S4 Band centers of the conduction band and valence band of 1H-Tetrazole at different pressures

| Pressure | Conduction band (eV) | Valence band (eV) |
|----------|----------------------|-------------------|
| 8 GPa    | 5.29                 | -1.45             |
| 9 GPa    | 5.14                 | -1.60             |
| 10 GPa   | 5.23                 | -1.53             |

Table S5 Band centers of different atoms in 1H-Tetrazole at different pressures

| Pressure | C (eV) | N (eV) | H (eV) |
|----------|--------|--------|--------|
| 8 GPa    | -2.51  | -0.23  | -1.05  |
| 9 GPa    | -2.58  | -0.14  | -1.07  |
| 10 GPa   | -2.52  | -0.14  | -1.05  |

Table S6 The frequencies of 1-H Tetrazole at Gamma at 8 GPa, 9 GPa, 10GPa

| Pressure(GPa)                |               | 8        | 9        | 10       |
|------------------------------|---------------|----------|----------|----------|
| Frequency(cm <sup>-1</sup> ) | 1 <i>f</i>    | 3239.691 | 3226.538 | 3243.629 |
|                              | 2 <i>f</i>    | 3235.231 | 3221.935 | 3238.693 |
|                              | 3 <i>f</i>    | 2656.292 | 2683.459 | 2610.393 |
|                              | 4 <i>f</i>    | 2654.338 | 2676.247 | 2605.261 |
|                              | 5 <i>f</i>    | 1501.029 | 1502.430 | 1503.179 |
|                              | 6 <i>f</i>    | 1499.620 | 1501.371 | 1502.128 |
|                              | 7 <i>f</i>    | 1445.809 | 1446.871 | 1449.578 |
|                              | 8 <i>f</i>    | 1436.909 | 1438.336 | 1440.227 |
|                              | 9 <i>f</i>    | 1312.865 | 1312.244 | 1319.422 |
|                              | 10 <i>f</i>   | 1304.011 | 1303.651 | 1309.648 |
|                              | 11 <i>f</i>   | 1276.154 | 1275.822 | 1282.014 |
|                              | 12 <i>f</i>   | 1274.719 | 1273.231 | 1280.364 |
|                              | 13 <i>f</i>   | 1198.843 | 1195.260 | 1206.905 |
|                              | 14 <i>f</i>   | 1187.458 | 1183.242 | 1194.837 |
|                              | 15 <i>f</i>   | 1131.800 | 1132.065 | 1140.266 |
|                              | 16 <i>f</i>   | 1126.522 | 1124.972 | 1134.556 |
|                              | 17 <i>f</i>   | 1116.592 | 1116.983 | 1122.495 |
|                              | 18 <i>f</i>   | 1109.091 | 1110.198 | 1111.565 |
|                              | 19 <i>f</i>   | 1050.392 | 1050.185 | 1057.715 |
|                              | 20 <i>f</i>   | 1050.060 | 1048.386 | 1055.397 |
|                              | 21 <i>f</i>   | 1026.487 | 1025.841 | 1032.735 |
|                              | 22 <i>f</i>   | 1010.137 | 1011.628 | 1014.480 |
|                              | 23 <i>f</i>   | 961.613  | 962.569  | 960.790  |
|                              | 24 <i>f</i>   | 948.276  | 950.450  | 945.027  |
|                              | 25 <i>f</i>   | 883.172  | 891.675  | 886.845  |
|                              | 26 <i>f</i>   | 882.294  | 889.380  | 885.180  |
|                              | 27 <i>f</i>   | 722.755  | 724.491  | 722.910  |
|                              | 28 <i>f</i>   | 720.512  | 721.420  | 720.398  |
|                              | 29 <i>f</i>   | 683.084  | 686.567  | 685.771  |
|                              | 30 <i>f</i>   | 679.850  | 683.185  | 682.590  |
|                              | 31 <i>f</i>   | 246.453  | 274.926  | 265.735  |
|                              | 32 <i>f</i>   | 231.503  | 251.633  | 245.791  |
|                              | 33 <i>f</i>   | 228.850  | 247.856  | 242.517  |
|                              | 34 <i>f</i>   | 212.865  | 238.290  | 228.540  |
|                              | 35 <i>f</i>   | 200.330  | 207.782  | 212.986  |
|                              | 36 <i>f</i>   | 196.068  | 199.146  | 204.382  |
|                              | 37 <i>f</i>   | 168.424  | 175.641  | 173.200  |
|                              | 38 <i>f</i>   | 152.166  | 159.941  | 159.501  |
|                              | 39 <i>f</i>   | 96.994   | 95.678   | 100.723  |
|                              | 40 <i>f/i</i> | 0.279    | 0.209    | 0.230    |
|                              | 41 <i>f/i</i> | 0.355    | 0.315    | 0.417    |

|  |         |       |       |       |
|--|---------|-------|-------|-------|
|  | $42f/i$ | 0.643 | 0.671 | 0.439 |
|--|---------|-------|-------|-------|

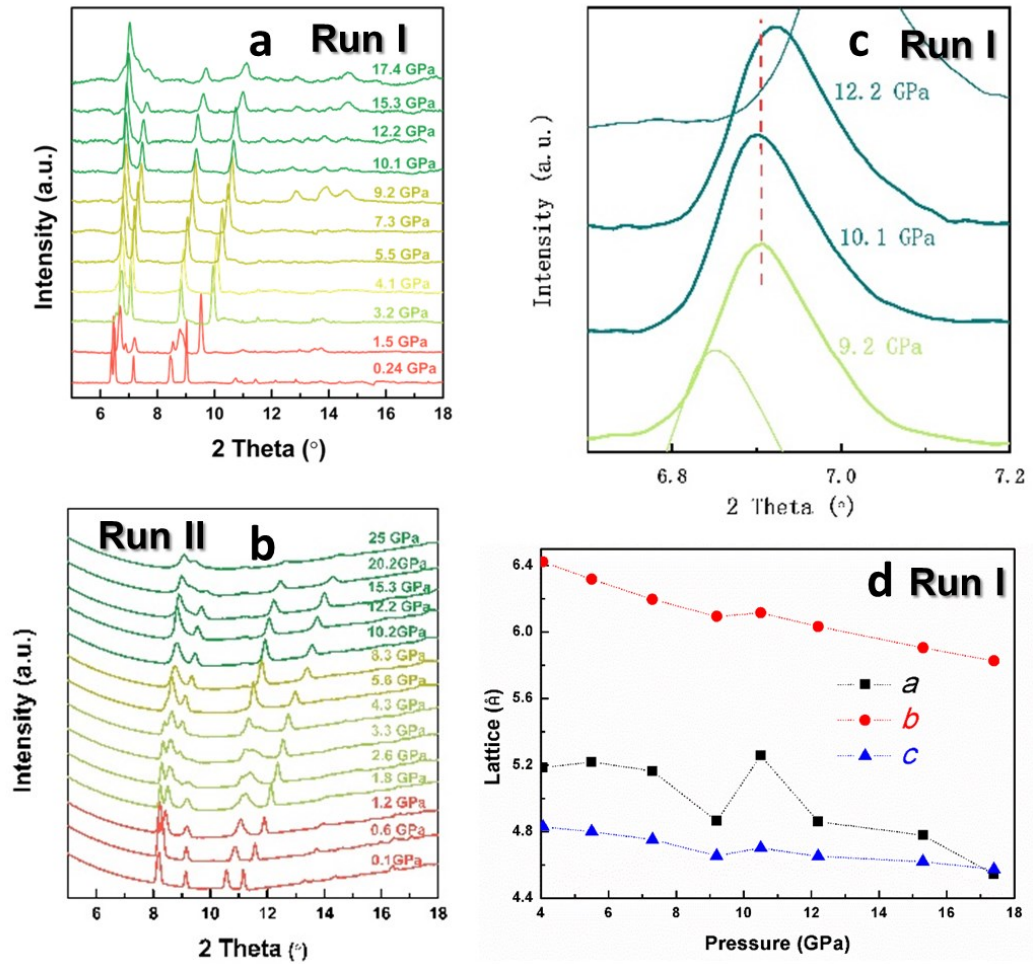

Figure S1 Diffraction patterns of X-ray and refined lattice parameters under pressure

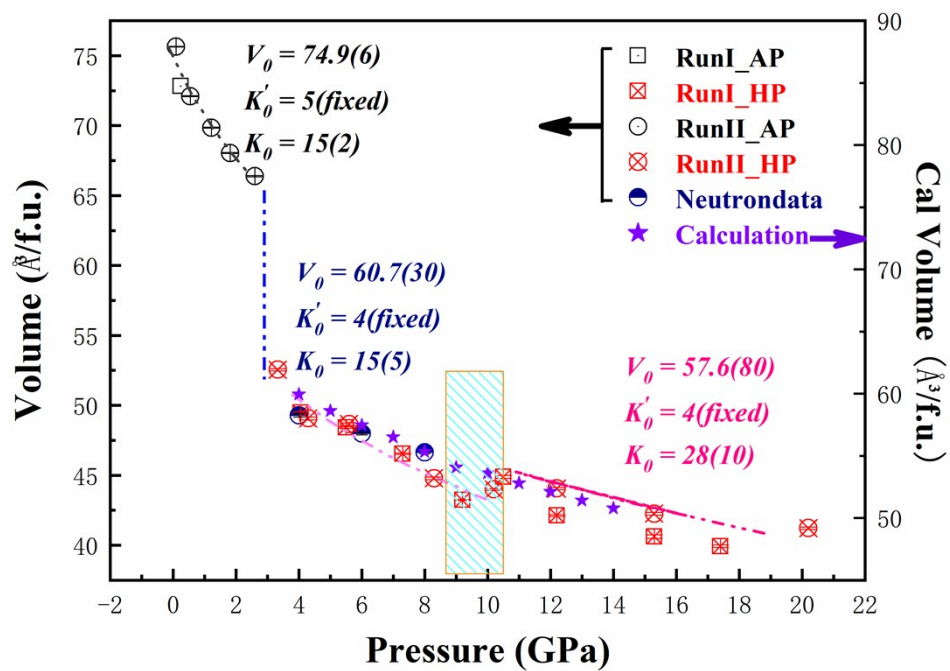

Figure S2 Refined volume of X-ray and neutron diffraction.

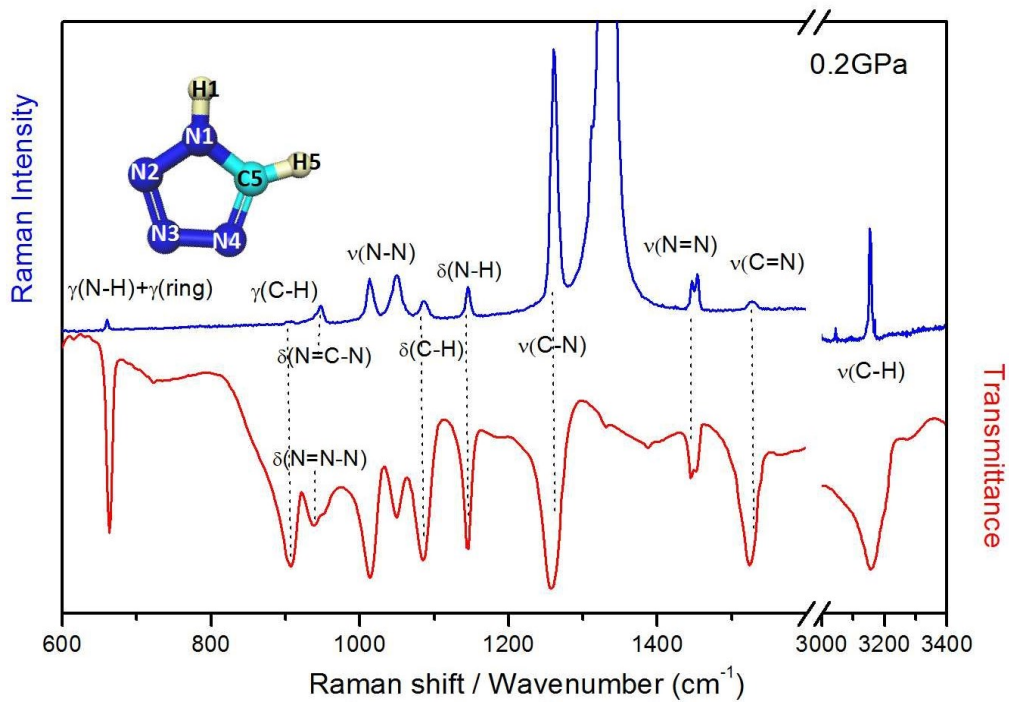

Figure S3 the Raman and IR spectra at near ambient pressure in the 600-3400  $\text{cm}^{-1}$  region. The corresponding vibration modes were donated.

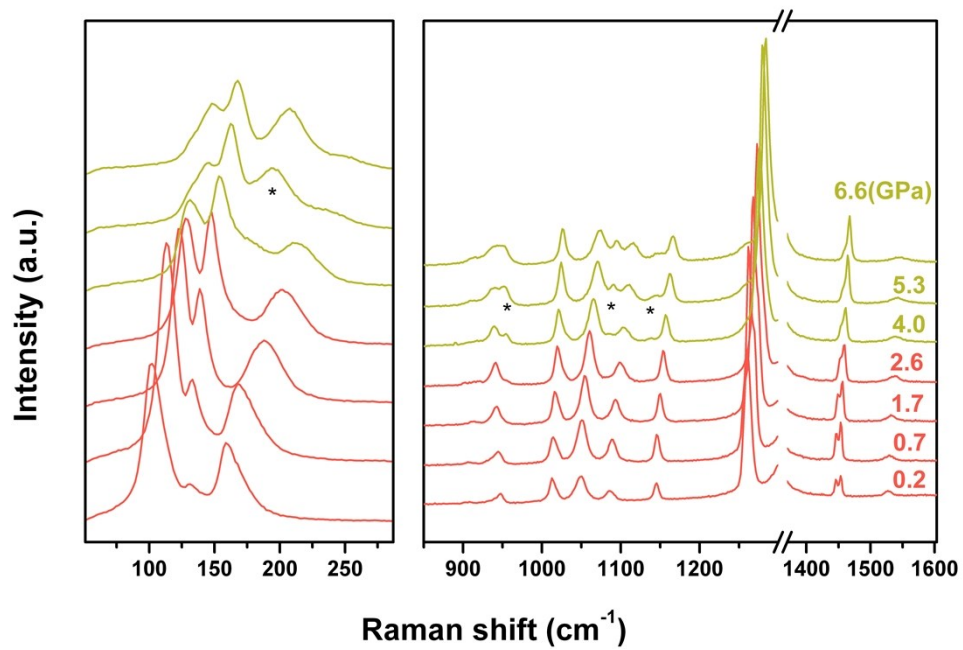

Figure S4 Raman spectra in a particular spectral region and pressure, indicating the first structural transition as reported in Ref. [2]

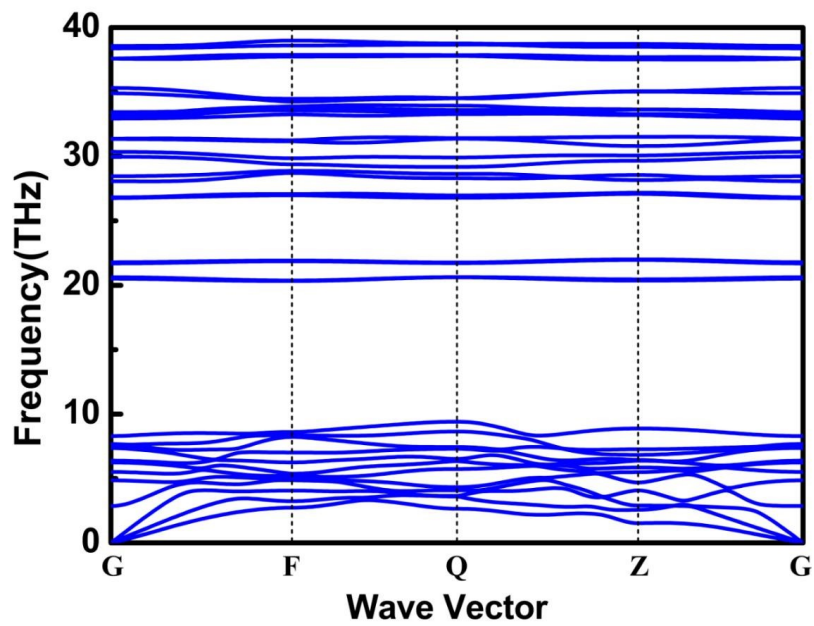

Figure S5 Phonon dispersion curves of 1-H Tetrazole at 8GPa.

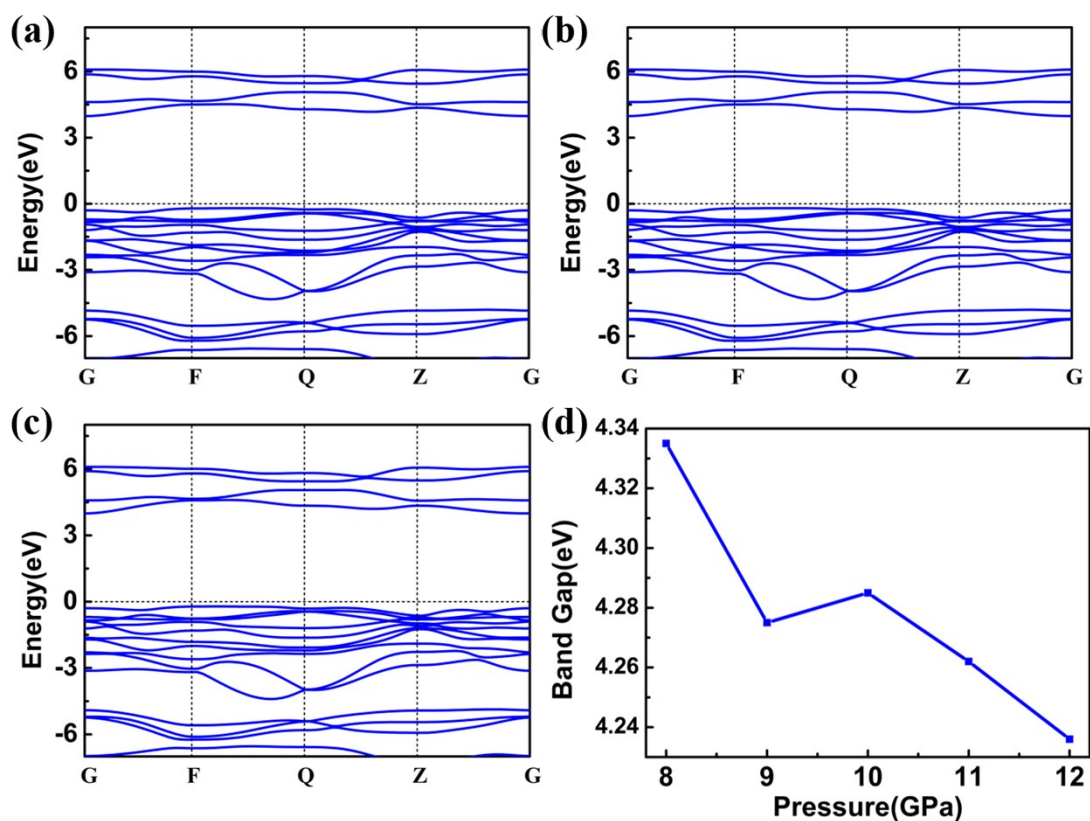

Figure S6 The electronic band structure at (a) 8 GPa, (b) 9 GPa, (c) 10 GPa and (d) the change of bandgap with pressure of 1-H Tetrazole.

#### References:

- 1 X. D. Wen, R. Hoffmann, N. W. Ashcroft, *J. Am. Chem. Soc.*, 2011, **133**, 9023-9035
- 2 W. B. Li, X. L. Huang, K. Bao, et al., *Scientific Reports*, 2017, **7**, 39249
- 3 M. M. Sokolova, V. V. Melynikov, et al., *Zh. Obshch. Khim.*, 1975, **11**, 1744
